# Supplementary material
Source: MDPI journal article supplement (https://www.mdpi.com/2225-1154/10/7/93)
Supplement: s1 [file s1]

## Supplementary Materials

### Stalagmite-inferred climate in the western Mediterranean during the Roman Warm Period

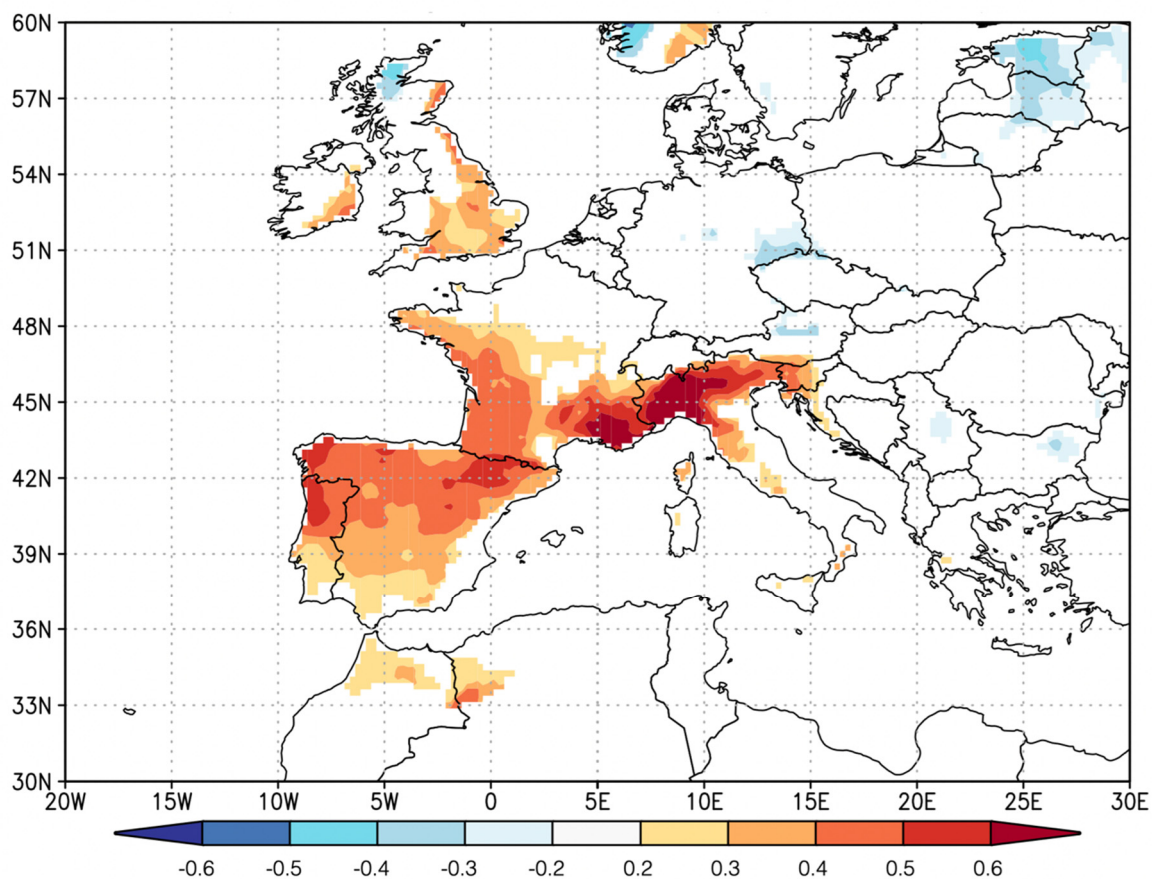

**Figure S1.** Correlation map. Correlation analysis between Genoa precipitation data and regional precipitation patterns during rainy seasons (September–February) in 1950–2008 A.D. (Data from E-OBS 25.0e, [53]). Color-shades indicate the correlation coefficients ( $p < 0.1$ ).

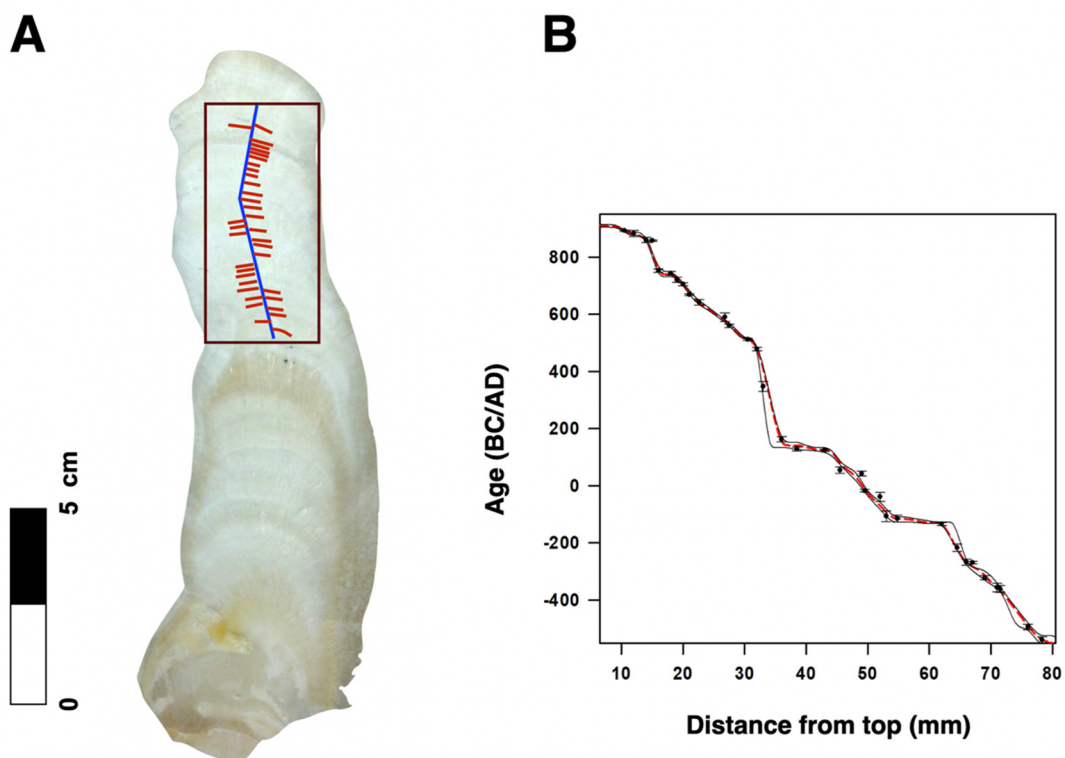

**Figure S2.** Photograph of stalagmite BA14-1 and age model. **(A)** Photograph of stalagmite BA14-1. The brown rectangle marks the section used in this study (6.5-80.5 mm from the top). The blue and red lines indicate the position for isotope analysis, U-Th dates. **(B)** StalAge-based age model [32] of BA14-1 during 6.5-80.5 mm from the top. The red line indicates the mean age and black lines denote 2-sigma age limits.

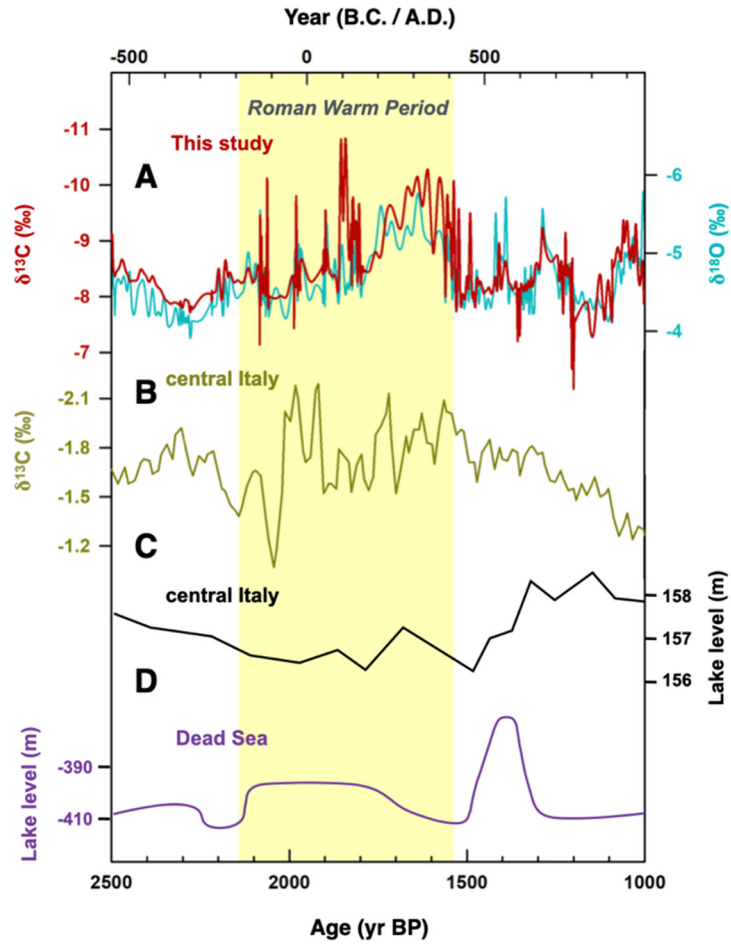

**Figure S3.** Comparison among Mediterranean proxy records. (A) Bāsura  $\delta^{13}\text{C}$  (red) and  $\delta^{18}\text{O}$  (tiffany blue). (B)  $\delta^{13}\text{C}$  records from Corchia cave, central Italy [18]. (C) composite lake level records from central Italy [16]. (D) Dead Sea level [17]. The yellow bar denotes the Roman Warm Period.

Table S1. Data of stable isotopes of BA14-1.

| Depth | Age (yr BP) | Error (2s) | $\delta^{13}\text{C}$ | $\delta^{18}\text{O}$ |
|-------|-------------|------------|-----------------------|-----------------------|
| 6.50  | 997.05      | 6.88       | -8.474                | -4.588                |
| 6.57  | 1001.68     | 6.83       | -7.874                | -5.594                |
| 6.64  | 1006.30     | 6.78       | -8.641                | -5.648                |
| 6.71  | 1010.92     | 6.72       | -8.306                | -4.836                |
| 6.79  | 1015.55     | 6.66       | -8.252                | -4.933                |
| 6.86  | 1020.17     | 6.59       | -8.658                | -4.918                |
| 6.93  | 1024.79     | 6.52       | -9.301                | -5.135                |
| 7.00  | 1029.42     | 6.45       | -8.617                | -4.881                |
| 7.25  | 1034.04     | 6.16       | -8.908                | -5.206                |
| 7.50  | 1038.66     | 5.83       | -8.735                | -4.855                |
| 7.75  | 1043.29     | 5.48       | -8.729                | -4.865                |
| 8.00  | 1047.91     | 5.10       | -9.288                | -5.014                |
| 9.00  | 1052.53     | 3.60       | -9.248                | -4.945                |
| 9.50  | 1057.16     | 2.98       | -8.976                | -5.000                |
| 11.00 | 1059.78     | 4.38       | -9.368                | -4.730                |
| 11.33 | 1062.41     | 6.85       | -9.031                | -4.797                |
| 11.67 | 1065.04     | 9.07       | -8.775                | -4.687                |
| 12.00 | 1067.66     | 10.03      | -8.634                | -4.636                |
| 12.50 | 1075.25     | 9.95       | -8.884                | -4.902                |
| 13.00 | 1082.83     | 9.71       | -8.650                | -4.552                |
| 14.00 | 1090.42     | 8.76       | -8.522                | -4.350                |
| 14.50 | 1091.21     | 5.32       | -8.554                | -4.166                |
| 15.00 | 1092.00     | 2.19       | -7.542                | -4.307                |
| 15.10 | 1102.50     | 2.30       | -8.294                | -4.124                |
| 15.20 | 1112.99     | 2.61       | -7.578                | -4.300                |
| 15.30 | 1123.49     | 3.06       | -8.369                | -4.299                |
| 15.40 | 1133.99     | 3.61       | -7.942                | -4.434                |
| 15.50 | 1144.49     | 4.21       | -7.303                | -4.275                |
| 15.60 | 1154.98     | 4.81       | -7.513                | -4.419                |
| 15.70 | 1165.48     | 5.36       | -7.906                | -4.273                |
| 15.80 | 1175.98     | 5.81       | -5.929                | -4.507                |
| 15.90 | 1186.47     | 6.12       | -5.927                | -4.351                |
| 16.00 | 1196.97     | 6.23       | -7.539                | -4.469                |
| 16.10 | 1197.48     | 6.23       | -7.526                | -4.362                |
| 16.20 | 1197.98     | 6.23       | -7.428                | -4.283                |
| 16.30 | 1198.49     | 6.23       | -6.859                | -4.520                |
| 16.40 | 1199.00     | 6.22       | -7.621                | -4.492                |
| 16.50 | 1199.50     | 6.22       | -6.510                | -4.459                |
| 16.60 | 1200.01     | 6.21       | -6.719                | -4.419                |
| 16.70 | 1200.52     | 6.21       | -7.935                | -4.336                |
| 16.80 | 1201.02     | 6.20       | -5.648                | -4.599                |
| 16.90 | 1201.53     | 6.19       | -5.116                | -4.552                |
| 17.00 | 1202.03     | 6.19       | -7.140                | -4.590                |
| 17.10 | 1202.54     | 6.18       | -6.953                | -4.407                |
| 17.20 | 1203.05     | 6.17       | -8.232                | -4.281                |
| 17.30 | 1203.55     | 6.17       | -8.472                | -4.550                |
| 17.40 | 1204.06     | 6.16       | -6.039                | -4.672                |
| 17.50 | 1204.57     | 6.16       | -6.723                | -4.546                |
| 17.60 | 1205.07     | 6.15       | -6.059                | -4.497                |
| 17.70 | 1205.58     | 6.15       | -7.793                | -4.435                |
| 17.80 | 1206.09     | 6.14       | -8.469                | -4.631                |
| 17.90 | 1206.59     | 6.14       | -8.436                | -4.432                |
| 18.00 | 1207.10     | 6.14       | -7.443                | -4.366                |
| 18.10 | 1209.30     | 6.21       | -8.396                | -4.626                |
| 18.20 | 1211.49     | 6.40       | -8.329                | -4.514                |
| 18.30 | 1213.69     | 6.68       | -8.530                | -4.869                |
| 18.40 | 1215.89     | 7.02       | -8.429                | -4.594                |

|       |         |       |        |        |
|-------|---------|-------|--------|--------|
| 18.50 | 1218.08 | 7.39  | -8.559 | -4.833 |
| 18.60 | 1220.28 | 7.76  | -8.399 | -4.469 |
| 18.70 | 1222.48 | 8.10  | -9.144 | -4.673 |
| 18.80 | 1224.68 | 8.38  | -8.402 | -4.570 |
| 18.90 | 1226.87 | 8.57  | -8.527 | -4.650 |
| 19.00 | 1229.07 | 8.64  | -7.693 | -4.569 |
| 19.25 | 1233.05 | 8.27  | -8.566 | -4.684 |
| 19.50 | 1237.03 | 7.37  | -8.419 | -4.565 |
| 19.75 | 1241.01 | 6.30  | -8.311 | -4.420 |
| 20.00 | 1244.98 | 5.40  | -8.732 | -4.602 |
| 20.33 | 1263.10 | 4.38  | -8.626 | -4.977 |
| 20.67 | 1281.22 | 3.47  | -8.930 | -5.196 |
| 21.00 | 1287.91 | 3.07  | -9.216 | -5.558 |
| 21.50 | 1294.61 | 4.29  | -8.535 | -4.801 |
| 22.00 | 1301.30 | 6.88  | -8.591 | -4.811 |
| 22.50 | 1308.00 | 9.21  | -8.530 | -4.617 |
| 23.00 | 1310.88 | 10.45 | -8.312 | -4.239 |
| 23.50 | 1313.76 | 11.50 | -8.233 | -4.312 |
| 24.00 | 1316.65 | 12.40 | -8.193 | -4.255 |
| 24.25 | 1319.53 | 12.80 | -8.347 | -4.822 |
| 24.50 | 1322.41 | 13.16 | -8.165 | -4.560 |
| 24.75 | 1325.30 | 13.48 | -8.244 | -4.226 |
| 25.00 | 1328.18 | 13.77 | -8.247 | -4.648 |
| 25.20 | 1331.06 | 13.97 | -8.115 | -4.456 |
| 25.40 | 1333.95 | 14.15 | -8.148 | -4.420 |
| 25.60 | 1336.83 | 14.30 | -8.219 | -4.814 |
| 25.80 | 1339.71 | 14.43 | -8.093 | -4.367 |
| 26.00 | 1342.60 | 14.54 | -8.181 | -4.330 |
| 26.09 | 1345.48 | 14.58 | -8.160 | -4.565 |
| 26.18 | 1348.36 | 14.62 | -8.123 | -4.385 |
| 26.27 | 1351.25 | 14.65 | -7.299 | -4.332 |
| 26.36 | 1354.13 | 14.67 | -8.148 | -4.483 |
| 26.45 | 1357.01 | 14.70 | -7.203 | -4.309 |
| 26.55 | 1359.90 | 14.71 | -8.135 | -4.420 |
| 26.64 | 1365.99 | 14.72 | -8.176 | -4.478 |
| 26.73 | 1372.09 | 14.73 | -8.134 | -4.521 |
| 26.82 | 1378.18 | 14.71 | -8.206 | -4.580 |
| 26.91 | 1384.28 | 14.16 | -8.333 | -4.449 |
| 27.00 | 1390.37 | 13.00 | -8.617 | -5.702 |
| 27.25 | 1395.14 | 8.46  | -8.550 | -5.046 |
| 27.50 | 1399.92 | 5.62  | -8.288 | -4.911 |
| 27.75 | 1404.69 | 5.18  | -8.220 | -4.951 |
| 28.00 | 1409.46 | 4.78  | -8.959 | -4.736 |
| 28.33 | 1414.23 | 4.31  | -8.138 | -4.633 |
| 28.67 | 1419.01 | 3.91  | -8.336 | -5.512 |
| 29.00 | 1423.78 | 3.57  | -8.220 | -4.708 |
| 29.33 | 1428.55 | 3.30  | -8.064 | -4.413 |
| 29.67 | 1433.32 | 3.10  | -8.081 | -4.299 |
| 30.00 | 1438.10 | 2.96  | -8.167 | -4.396 |
| 30.50 | 1442.93 | 2.89  | -8.114 | -4.388 |
| 31.00 | 1447.77 | 3.20  | -8.097 | -4.287 |
| 31.20 | 1452.60 | 3.50  | -8.058 | -4.518 |
| 31.40 | 1457.44 | 3.91  | -8.185 | -4.565 |
| 31.60 | 1462.27 | 4.41  | -8.271 | -4.611 |
| 31.80 | 1467.11 | 5.01  | -8.215 | -4.355 |
| 32.00 | 1471.95 | 5.72  | -8.322 | -4.767 |
| 32.10 | 1476.58 | 6.35  | -7.809 | -4.585 |
| 32.20 | 1481.22 | 7.43  | -8.079 | -4.381 |
| 32.30 | 1485.86 | 8.82  | -8.122 | -4.501 |
| 32.40 | 1490.50 | 10.41 | -9.498 | -4.707 |
| 32.50 | 1495.14 | 12.09 | -8.226 | -4.380 |
| 32.60 | 1499.78 | 13.72 | -8.365 | -4.665 |

|       |         |       |         |        |
|-------|---------|-------|---------|--------|
| 32.70 | 1504.42 | 15.20 | -7.992  | -4.394 |
| 32.80 | 1509.06 | 16.41 | -7.984  | -4.303 |
| 32.90 | 1513.70 | 17.22 | -8.014  | -4.432 |
| 33.00 | 1518.34 | 17.51 | -7.999  | -4.400 |
| 33.10 | 1522.98 | 17.49 | -9.569  | -4.814 |
| 33.20 | 1527.62 | 17.42 | -8.027  | -4.304 |
| 33.30 | 1532.26 | 17.31 | -8.246  | -4.762 |
| 33.40 | 1536.90 | 17.15 | -10.072 | -4.791 |
| 33.50 | 1541.54 | 16.96 | -8.334  | -4.417 |
| 33.60 | 1546.18 | 16.74 | -9.275  | -5.164 |
| 33.70 | 1550.81 | 16.48 | -9.238  | -4.891 |
| 33.80 | 1555.45 | 16.20 | -9.766  | -5.228 |
| 33.90 | 1560.09 | 15.89 | -8.016  | -4.375 |
| 34.00 | 1564.73 | 15.56 | -9.238  | -4.962 |
| 34.10 | 1579.54 | 15.21 | -10.076 | -5.288 |
| 34.20 | 1594.34 | 14.85 | -8.773  | -5.127 |
| 34.30 | 1609.15 | 14.47 | -10.259 | -5.156 |
| 34.40 | 1623.96 | 14.08 | -9.622  | -5.324 |
| 34.50 | 1638.76 | 13.68 | -10.149 | -5.766 |
| 34.60 | 1653.57 | 13.28 | -9.809  | -5.247 |
| 34.70 | 1668.38 | 12.88 | -9.960  | -5.354 |
| 34.80 | 1683.18 | 12.48 | -9.279  | -5.087 |
| 34.90 | 1697.99 | 12.08 | -9.356  | -5.126 |
| 35.00 | 1712.79 | 11.69 | -9.619  | -5.409 |
| 35.20 | 1727.60 | 10.95 | -9.433  | -5.228 |
| 35.40 | 1742.41 | 10.28 | -8.719  | -5.608 |
| 35.60 | 1757.21 | 9.69  | -8.804  | -5.071 |
| 35.80 | 1772.02 | 9.22  | -8.476  | -4.960 |
| 36.00 | 1786.82 | 8.88  | -8.469  | -4.701 |
| 36.33 | 1791.05 | 8.51  | -8.446  | -4.613 |
| 36.67 | 1795.28 | 8.23  | -8.522  | -4.565 |
| 37.00 | 1799.51 | 8.02  | -8.325  | -4.496 |
| 37.25 | 1803.74 | 7.89  | -9.661  | -5.157 |
| 37.50 | 1807.97 | 7.78  | -8.263  | -4.569 |
| 37.75 | 1812.19 | 7.68  | -9.341  | -5.313 |
| 38.00 | 1816.42 | 7.56  | -9.029  | -4.743 |
| 38.33 | 1820.65 | 7.38  | -9.781  | -5.092 |
| 38.67 | 1821.77 | 7.14  | -8.777  | -4.702 |
| 39.00 | 1822.89 | 6.85  | -9.729  | -4.571 |
| 40.00 | 1824.01 | 5.80  | -8.208  | -4.585 |
| 41.00 | 1825.13 | 4.69  | -9.306  | -4.981 |
| 41.25 | 1830.96 | 4.43  | -8.658  | -4.562 |
| 41.50 | 1836.79 | 4.20  | -9.784  | -4.616 |
| 41.75 | 1842.63 | 3.99  | -10.801 | -4.472 |
| 42.00 | 1848.46 | 3.81  | -9.359  | -4.919 |
| 42.50 | 1854.29 | 3.54  | -10.821 | -5.049 |
| 43.00 | 1860.12 | 3.45  | -8.491  | -4.402 |
| 43.50 | 1865.95 | 4.27  | -8.200  | -4.565 |
| 44.00 | 1871.78 | 6.21  | -8.380  | -4.927 |
| 44.25 | 1877.61 | 7.38  | -8.356  | -4.663 |
| 44.50 | 1883.45 | 8.54  | -8.394  | -4.790 |
| 44.75 | 1889.28 | 9.61  | -8.534  | -4.790 |
| 45.00 | 1895.11 | 10.49 | -8.850  | -5.385 |
| 45.50 | 1896.49 | 11.31 | -8.493  | -4.836 |
| 46.00 | 1897.87 | 11.24 | -9.535  | -5.235 |
| 47.00 | 1899.26 | 10.73 | -8.876  | -4.599 |
| 47.33 | 1900.64 | 10.44 | -8.432  | -4.327 |
| 47.67 | 1902.02 | 10.10 | -8.707  | -4.587 |
| 48.00 | 1903.41 | 9.70  | -8.802  | -4.809 |
| 48.33 | 1904.79 | 9.25  | -8.409  | -4.377 |
| 48.67 | 1906.17 | 8.73  | -8.531  | -4.490 |
| 49.00 | 1907.56 | 8.16  | -8.527  | -4.490 |

|       |         |       |        |        |
|-------|---------|-------|--------|--------|
| 49.25 | 1927.37 | 6.23  | -8.323 | -4.587 |
| 49.50 | 1947.18 | 4.52  | -8.336 | -4.424 |
| 49.75 | 1966.99 | 4.75  | -8.672 | -5.057 |
| 50.00 | 1968.94 | 5.40  | -8.120 | -4.579 |
| 50.17 | 1970.90 | 6.02  | -8.478 | -4.864 |
| 50.33 | 1972.85 | 6.76  | -8.519 | -5.111 |
| 50.50 | 1974.80 | 7.61  | -8.354 | -4.724 |
| 50.67 | 1976.75 | 8.53  | -8.175 | -4.392 |
| 50.83 | 1978.70 | 9.50  | -5.242 | -4.868 |
| 51.00 | 1980.66 | 10.49 | -9.802 | -5.000 |
| 51.25 | 1982.61 | 11.99 | -8.234 | -4.589 |
| 51.50 | 1984.56 | 13.41 | -8.400 | -5.015 |
| 51.75 | 1986.51 | 14.68 | -7.430 | -4.407 |
| 52.00 | 1988.47 | 15.72 | -8.341 | -4.711 |
| 52.25 | 2005.44 | 16.71 | -8.035 | -4.205 |
| 52.50 | 2022.41 | 17.75 | -8.015 | -4.331 |
| 52.75 | 2039.37 | 18.57 | -7.966 | -4.553 |
| 53.00 | 2056.34 | 18.90 | -8.006 | -4.232 |
| 53.25 | 2057.59 | 18.62 | -7.968 | -4.208 |
| 53.50 | 2058.83 | 17.89 | -7.817 | -4.328 |
| 53.75 | 2060.07 | 16.84 | -8.719 | -4.896 |
| 54.00 | 2061.31 | 15.63 | -9.645 | -5.366 |
| 54.25 | 2062.55 | 14.41 | -9.989 | -5.028 |
| 54.50 | 2063.80 | 13.32 | -8.132 | -4.513 |
| 54.75 | 2065.04 | 12.52 | -8.426 | -4.455 |
| 55.00 | 2066.23 | 11.99 | -8.006 | -4.194 |
| 55.33 | 2067.42 | 11.33 | -8.519 | -4.381 |
| 55.67 | 2068.60 | 10.70 | -8.161 | -4.346 |
| 56.00 | 2069.79 | 10.11 | -8.123 | -4.506 |
| 56.50 | 2070.98 | 9.27  | -8.094 | -4.372 |
| 57.00 | 2072.17 | 8.51  | -8.301 | -4.738 |
| 57.33 | 2073.36 | 8.04  | -8.345 | -4.597 |
| 57.67 | 2074.55 | 7.60  | -8.064 | -4.407 |
| 58.00 | 2075.74 | 7.20  | -8.191 | -4.693 |
| 58.33 | 2076.93 | 6.83  | -8.504 | -4.906 |
| 58.67 | 2078.12 | 6.49  | -9.085 | -4.777 |
| 59.00 | 2079.31 | 6.18  | -8.262 | -4.594 |
| 59.25 | 2080.50 | 5.97  | -8.032 | -4.542 |
| 59.50 | 2081.69 | 5.78  | -9.444 | -5.552 |
| 59.75 | 2082.88 | 5.61  | -7.172 | -4.679 |
| 60.00 | 2084.07 | 5.45  | -8.390 | -4.344 |
| 60.33 | 2094.43 | 5.28  | -8.353 | -4.872 |
| 60.67 | 2104.79 | 5.13  | -8.287 | -4.605 |
| 61.00 | 2115.15 | 5.02  | -8.515 | -5.014 |
| 61.33 | 2125.51 | 4.94  | -8.311 | -4.607 |
| 61.67 | 2135.88 | 4.89  | -8.249 | -4.479 |
| 62.00 | 2146.24 | 4.87  | -8.293 | -4.423 |
| 62.50 | 2156.60 | 5.73  | -8.259 | -4.521 |
| 63.00 | 2166.96 | 7.77  | -8.438 | -4.707 |
| 63.25 | 2173.22 | 8.99  | -8.358 | -4.315 |
| 63.50 | 2179.48 | 10.21 | -8.654 | -4.676 |
| 63.75 | 2185.74 | 11.33 | -8.188 | -4.205 |
| 64.00 | 2192.00 | 12.25 | -7.964 | -4.509 |
| 64.50 | 2198.26 | 13.10 | -8.494 | -4.663 |
| 65.00 | 2204.52 | 12.84 | -8.199 | -4.372 |
| 65.50 | 2210.77 | 12.03 | -8.072 | -4.319 |
| 66.00 | 2217.03 | 10.69 | -8.080 | -4.267 |
| 66.25 | 2217.48 | 9.37  | -8.088 | -4.230 |
| 66.50 | 2217.92 | 7.51  | -8.084 | -4.495 |
| 66.75 | 2218.37 | 5.86  | -7.925 | -4.349 |
| 67.00 | 2218.82 | 5.14  | -8.031 | -4.379 |
| 67.50 | 2245.00 | 5.27  | -8.008 | -4.158 |

|       |         |       |        |        |
|-------|---------|-------|--------|--------|
| 68.00 | 2271.18 | 5.64  | -7.782 | -4.130 |
| 68.33 | 2275.06 | 6.02  | -7.830 | -4.059 |
| 68.67 | 2278.95 | 6.51  | -7.716 | -3.917 |
| 69.00 | 2282.83 | 7.12  | -7.888 | -4.199 |
| 69.33 | 2286.72 | 8.16  | -7.930 | -4.106 |
| 69.67 | 2290.61 | 9.76  | -7.949 | -4.174 |
| 70.00 | 2294.49 | 11.58 | -7.935 | -4.107 |
| 70.33 | 2298.38 | 13.29 | -7.836 | -4.260 |
| 70.67 | 2302.26 | 14.56 | -7.804 | -4.089 |
| 71.00 | 2306.15 | 15.06 | -7.912 | -4.338 |
| 71.33 | 2308.28 | 12.53 | -7.869 | -4.280 |
| 71.67 | 2310.41 | 11.48 | -7.855 | -4.078 |
| 72.00 | 2318.71 | 11.28 | -7.894 | -4.300 |
| 72.25 | 2327.01 | 11.14 | -7.888 | -4.145 |
| 72.50 | 2335.31 | 11.01 | -7.877 | -4.070 |
| 72.75 | 2343.61 | 10.89 | -7.920 | -4.117 |
| 73.00 | 2351.91 | 10.78 | -7.978 | -4.447 |
| 73.33 | 2360.21 | 10.64 | -8.103 | -4.210 |
| 73.67 | 2368.52 | 10.52 | -8.165 | -4.251 |
| 74.00 | 2376.82 | 10.42 | -8.246 | -4.227 |
| 74.25 | 2385.12 | 10.35 | -8.367 | -4.549 |
| 74.50 | 2393.42 | 10.29 | -8.264 | -4.207 |
| 74.75 | 2401.72 | 10.24 | -8.354 | -4.357 |
| 75.00 | 2410.02 | 10.20 | -8.430 | -4.636 |
| 75.25 | 2418.32 | 10.17 | -8.485 | -4.625 |
| 75.50 | 2426.62 | 10.15 | -8.321 | -4.518 |
| 75.75 | 2434.92 | 10.13 | -8.285 | -4.239 |
| 76.00 | 2443.23 | 10.13 | -8.282 | -4.337 |
| 76.33 | 2448.93 | 10.13 | -8.275 | -4.767 |
| 76.67 | 2454.64 | 10.14 | -8.387 | -4.533 |
| 77.00 | 2460.34 | 10.16 | -8.471 | -4.607 |
| 77.25 | 2466.05 | 10.17 | -8.614 | -4.705 |
| 77.50 | 2471.75 | 10.19 | -8.658 | -4.617 |
| 77.75 | 2477.46 | 10.21 | -8.538 | -4.640 |
| 78.00 | 2483.16 | 10.24 | -8.472 | -4.666 |
| 78.33 | 2488.87 | 10.28 | -8.403 | -4.491 |
| 78.67 | 2490.63 | 10.33 | -8.361 | -4.206 |
| 79.00 | 2492.39 | 10.38 | -8.427 | -4.479 |
| 79.33 | 2494.15 | 10.43 | -8.467 | -4.567 |
| 79.67 | 2495.92 | 10.50 | -8.659 | -4.823 |
| 80.00 | 2497.68 | 10.58 | -9.095 | -4.912 |
| 80.25 | 2499.44 | 10.66 | -9.019 | -5.106 |
| 80.50 | 2501.20 | 10.74 | -8.710 | -4.727 |

---
